# Supplementary material for: Relying on the non-radical degradation of oxytetracycline by peroxymonosulfate activated with a magnetic Cu/Fe composite: performance and mechanism
Source: Royal Society of Chemistry journal article supplement (doi:10.1039/d2nj03125f), 2022-01-01
Supplement: d2nj03125f1.pdf [file d2nj03125f1.pdf]

**Supporting Information for**

**Relying on the non-radical degradation of oxytetracycline by**

**peroxymonosulfate activated with magnetic Cu/Fe composite:**

**performance and mechanism**

Jiabao Sun<sup>a,b</sup>, Qiang Li <sup>a,b</sup>\*, Dajie Zhang <sup>a,b</sup>\*, Dongsheng Xia <sup>a,b</sup>

<sup>a</sup> School of Environmental Engineering, Wuhan Textile University, Wuhan  
430073, PR China

<sup>b</sup> Engineering Research Center for Clean Production of Textile Dyeing and  
Printing, Ministry of Education, Wuhan 430073, China

**\* Corresponding author:** Qiang Li, Dajie Zhang

Tel.: +86-27-59367338.

E-mail addresses: qiangli@wtu.edu.cn (Qiang Li); 2007050@wtu.edu.cn (Dajie Zhang).

---

**This file includes 1 Table and 3 Figures.**

**Table S1**

The BET surface area pore volume and pore size of the as-obtained catalysts.

| Sample    | BET surface<br>area (m <sup>2</sup> g <sup>-1</sup> ) | Pore volume<br>(cm <sup>3</sup> /g) | Pore size<br>(nm) |
|-----------|-------------------------------------------------------|-------------------------------------|-------------------|
| Cu/Fe-1   | 26.090                                                | 0.06793                             | 10.42             |
| Cu/Fe-2   | 14.056                                                | 0.05118                             | 14.57             |
| Cu/Fe-0.5 | 31.363                                                | 0.06708                             | 8.56              |

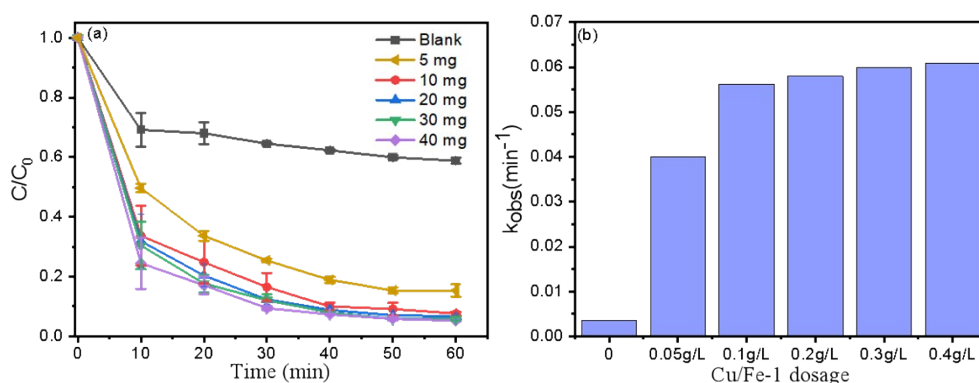

**Fig. S1.** Effect of catalyst dosage (a), kinetic rates of catalyst dosage (b) (Condition: [OTC]=20 mg/L, [PMS]=0.2 g/L, T=25 °C, without pH adjustment).

The effect of catalyst dosage was investigated on OTC degradation. As shown in Fig. S1, 41.1% of OTC was degraded without catalyst. OTC removal significantly increased with the catalyst dosage of 0.05-0.1 mg/L from 81 % to 94%, the  $k_{obs}$  also increased from  $0.040 \text{ min}^{-1}$  to  $0.056 \text{ min}^{-1}$ . The increased amount of catalysts increased  $\text{SO}_4^{\bullet-}$  production via PMS activation [1]. In the other words, the number of active sites increased with increasing catalyst dosage [2]. But the performance did not continue to improve as the catalyst dosage increased. This phenomenon could be attributed to the increased self-consumption of  $\text{SO}_4^{\bullet-}$  (Eq. (1)) with the presence of excess catalysts in the system. Consequently, the generated  $\text{SO}_4^{\bullet-}$  reacted with each other, thereby leading to inactivation. Therefore, the catalyst dosage of 0.1g/L was the most suitable for optimizing catalytic activity and economic cost.

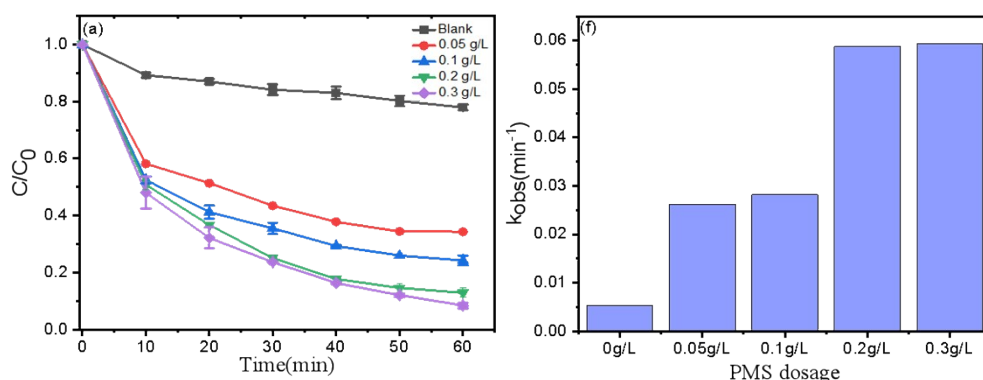

**Fig. S2.** Effect of PMS dosage (a), kinetic rates of PMS dosage (b) (Condition: [OTC]=20 mg/L, [catalyst] =0.1g/L, T=25 °C, without pH adjustment).

To explore the optimal PMS dosage, the degradation of OTC at different PMS concentrations had been performed. As Fig. S2a clearly showed, less than 20% OTC was removed by catalyst. OTC removal significantly increased from 65% to 90% as the PMS concentration increased from 0.05g/L to 0.2g/L. The  $k_{obs}$  increased from 0.026min<sup>-1</sup> to 0.053 min<sup>-1</sup> (Fig. S2b). When PMS concentration exceeded 0.2 g/L, the degradation efficiency could barely increase, which could be explained by the radical interactions as a result of the excessive  $SO_4^{\cdot-}$  generation [3]. Thus, the suitable concentration of PMS was 0.2 g/L.

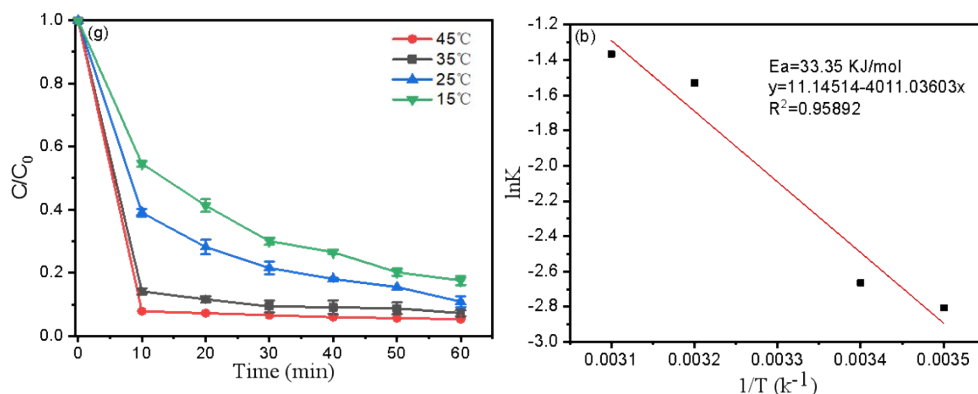

**Fig. S3.** Effect of reaction temperature (a), kinetic rates of reaction temperature (b) (Condition: [OTC]=20mg/L, [catalyst]=0.1g/L, [PMS]=0.2g/L, without pH adjustment).

The reaction temperature played important role in catalytic performance. As shown in Fig.S3 (a), higher temperature significantly accelerated OTC removal and reaction constant  $k$ . As shown in Eq.2, Fig. S3 (b) had fitted a plot of  $1/T$  versus  $\ln k$ . The reaction activation energy ( $E_a$ ) of OTC degradation was 33.35 kJ mol<sup>-1</sup>. The  $E_a$  was higher than the diffusion-controlled reactions (10<sup>-13</sup> kJ/mol), indicating that the degradation process was mainly controlled by the intrinsic chemical reaction on catalyst surface instead of the mass transfer process [4].

---

## References:

- [1] Q. Shi, A. Li, Z. Qing, and Y. Li. Oxidative degradation of Orange G by persulfate activated with iron-immobilized resin chars, *Journal of Industrial & Engineering Chemistry*. 25 (2015) 308-13. 10.1016/j.jiec.2014.11.010.
- [2] Y. Zhang, Q. Zhang, and J. Hong. Sulfate radical degradation of acetaminophen by novel iron–copper bimetallic oxidation catalyzed by persulfate: Mechanism and degradation pathways, *Applied Surface Science*. 422 (2017) 443-51. 10.1016/j.apsusc.2017.05.224.
- [3] Y. Ye, J. Wan, Q. Li, Y. Huang, and D. Xia. Catalytic Oxidation of Dyeing Wastewater by Copper Oxide Activating Persulfate: Performance, Mechanism and Application, *International Journal of Environmental Research* (2020). 10.1007/s41742-020-00296-9.
- [4] L. Chen, S. Yang, Z. Xu, H. Yang, T. Cai, and D. Ding. Biochar modification significantly promotes the activity of  $\text{Co}_3\text{O}_4$  towards heterogeneous activation of peroxymonosulfate, *Chemical Engineering Journal*. 354 (2018) 856-65. 10.1016/j.cej.2018.08.098.
